# Supplementary material for: Oligoribonucleotide (ORN) Interference-PCR (ORNi-PCR): A Simple Method for Suppressing PCR Amplification of Specific DNA Sequences Using ORNs
Source: PubMed Central journal article supplement (PMC4236179; doi:10.1371/journal.pone.0113345), 2014-11-18
Supplement: pone.0113345.s002.pdf [file pone.0113345.s002.pdf]

**Table S1. PCR primers used in this study**

| Number | Name            | Sequence (5'-3')                      | Experiments                                       |
|--------|-----------------|---------------------------------------|---------------------------------------------------|
| 27242  | hIRF1-913F      | ctctgttcctaaagccagccagggggagt         | ORNi-PCR in Figures 1-3                           |
| 27241  | hIRF1-10R       | gcggcgccaccgagcaatccaacacttag         | ORNi-PCR in Figures 1-3                           |
| 27645  | hIRF1+112F      | ccggcaacctctgccttcttcccttcca          | ORNi-PCR in Figures 1H, I                         |
| 27377  | hIRF1+269F      | aataaaaggcgcgcggggaccaggaagtg         | ORNi-PCR in Figures 1B-G, 2, 3                    |
| 27378  | hIRF1+1167R     | tcagtgcggaggggagctgcgctggaataa        | ORNi-PCR in Figures 1-3                           |
| 27456  | hIRF1-913F_KpnI | ctggtaccctctgttcctaaagccagccagggggagt | Construction of hIRF-1-p/pBS and hIRF-1-p-MCS/pBS |
| 27457  | hIRF1-10R_SacI  | cgagagctcggcgccaccgagcaatccaacacttag  | Construction of hIRF-1-p/pBS                      |
| 27646  | hIRF-1-10R_XhoI | tgccctcgaggcgccaccgagcaatccaacacttag  | Construction of hIRF-1-p-MCS/pBS                  |
| 26446  | M13 Primer M4   | gtttcccagtcacgac                      | ORNi-PCR in Figures 4-6                           |
| 26445  | M13 Primer RV   | gcatagctgtttcctg                      | ORNi-PCR in Figures 4-6                           |
